# Supplementary material for: Exploring the Mechanism of Berberine Intervention in Ulcerative Colitis from the Perspective of Inflammation and Immunity Based on Systemic Pharmacology
Source: Evid Based Complement Alternat Med. 2021 Jun 9;2021:9970240. doi: 10.1155/2021/9970240 (PMC8208865; doi:10.1155/2021/9970240)
Supplement: Supplementary Materials — Table S1: berberine potential targets. Table S2: UC genes. Table S3: biological processes of clusters. Table S4: signaling pathways. [file 9970240.f1.zip › Table S1.xlsx]

## Sheet: Sheet1
Table S1 Berberine Potential Targets
PPIA
CA2
TTR
BCHE
AR
CYP19A1
ESR2
APOA2
STS
ESR1
PIM1
CFD
RXRA
BRAF
ADAM17
ALB
NOS3
PDE4D
GSR
ESRRG
CCNA2
PRKACA
SRC
SHBG
PGR
ANXA5
KIF11
SORD
F2
HSD11B1
CDK2
TYMS
KDR
MMP13
MAPK14
HSD17B1
HSP90AA1
MMP12
NR3C2
AKR1B1
AKR1C1
ADH1C
PTPN1
F10
GC
CASP7
SULT2A1
PDE3B
PTPN11
CHEK1
AKR1C3
HSPA8
PDE4B
PDPK1
ADH5
HDAC8
MET
NR1H2
AURKA
ITK
CTNNA1
PAH
XIAP
SOD2
MMP8
MMP3
EPHB4
HPGDS
MAPK10
PDE5A
PDK2
GSK3B
CDK6
DPP4
EPHX2
NR1H3
BACE1
NQO2
ADK
DHODH
MAPKAPK2
MTAP
SEC14L2
MAOB
MTHFD1
FKBP1A
TRAPPC3
SERPINA1
PPARG
JAK3
ERBB4
NR1I2
LCK
GSTA1
REN
IGF1
BHMT
FGFR1
CTSG
THRB
FABP3
SULT1E1
NR1H4
SULT2B1
THRA
MME
ACADM
ELANE
PTK2
PLA2G2A
TGFBR1
FABP6
RBP4
HCK
SDS
NR3C1
TEK
GSTA3
NMNAT1
IL2
RARA
PAPSS1
HMGCR
GSTP1
METAP2
S100A9
CYP2C9
FABP4
DHFR
TGM3
HNF4G
RARG
ABO
CCL5
FECH
RARB
ZAP70
PPP1CC
FDPS
CRABP2
DPEP1
VDR
MMP2
LCN2
DTYMK
ENSG00000160200
SETD7
PRKCQ
CTSS
IGF1R
CMA1
LTA4H
OTC
INSR
CTSK
FABP7
RXRB
BCAT2
HMOX1
BIRC7
FKBP1B
CTSF
EIF4E
STAT1
HINT1
ABL1
KAT2B
RORA
GSTM2
MAP2K1
TGFB2
GPI
DCK
TPSB2
HPRT1
CASP1
EGFR
OAT
FOLH1
DUT
HNMT
PPARA
F11
ADAM33
FGG
UCK2
TTPA
HRAS
CASP3
GMPR
DCPS
MMP9
RFK
GMPR2
RAC1
PNMT
RAP2A
TAP1
APAF1
DOT1L
DAPK1
NT5M
BST1
PCK1
PROCR
HADH
ARL5B
SIRT5
SPR
AMY2A
FKBP3
NOD2
IL23R
ABCB1
IL10
IL6
IRF5
ATG16L1
IRGM
INAVA
IL10RA
IL10RB
MLH1
SMAD7
CTNNB1
MSH2
AKT1
MSH6
PIK3CA
TNF
HLA-DRB1
TLR2
TLR4
CXCL8
IL1B
BTNL2
MUC2
MPO
TP53
REG4
MST1
TNFSF15
IFNG
CRP
IL17A
IL4
MYO9B
IL1RN
REL
ZFP90
LACC1
ICAM1
APC
CCR6
IL22
SMAD3
IL1R1
S100A12
PRTN3
CCR3
DUOX2
CLDN18
TPMT
MUC12
BPI
TLR5
IL13
BRINP3
SMAD4
MIR21
UCN
IL23A
HLA-B
CCND1
TCF4
CLDN2
GPR35
H19
STAT3
LTF
POLE
POLD1
GALNT12
SLC22A4
IFNG-AS1
SLC22A5
NKX2-3
RIPK1
MIR145
CTLA4
ICOSLG
FOXD2-AS1
PTPN2
ODC1
BAX
MLH3
NOS2
IBD3
CARD9
AXIN2
PDGFRL
MT-CO1
IBD21
CDH1
TNFRSF1A
IBD2
NOD1
JAK2
CD40LG
PLCG2
VEGFA
MIR126
MIR143
MIR141
MIR34A
IBD8
NFKB1
IBD5
CD4
IL2RA
DEFB4A
CCL2
DLG5
TLR9
IBD7
PTPN22
IL12B
IL18
IBD6
NLRP3
IBD4
IBD9
CXCL5
MMP1
TIMP1
KRAS
ALOX5
MAP3K7
MADCAM1
BUB1
BUB1B
MUTYH
GREM1
MIR140
MIR192
MIRLET7A1
MIR26A1
MIR127
PSC
IBD11
IBD12
IBD15
IBD16
IBD18
IBD20
IBD22
IBD23
IBD24
IBD26
IBD27
NFKBIA
MUC5AC
IL26
TGFB1
HSPA1L
MICA
PTGS2
ITGA4
SLC11A1
FOXP3
MTHFR
RELA
SOCS1
TAC1
FCGR2A
MUC3A
FUT2
NFE2L2
CCL11
PTGER4
SIAE
NOX1
FCGR3A
CSF2
PMS2
HLA-A
SOCS3
IL21
HLA-DRA
IL6R
TNFRSF1B
KRT7
IL15
HLA-DQB1
RIPK2
FOS
MUC1
HMGB1
SELE
CXCR2
VIP
NFATC1
IL18RAP
MIR155
