# Supplementary material for: Exploring the Mechanism of Berberine Intervention in Ulcerative Colitis from the Perspective of Inflammation and Immunity Based on Systemic Pharmacology
Source: Evid Based Complement Alternat Med. 2021 Jun 9;2021:9970240. doi: 10.1155/2021/9970240 (PMC8208865; doi:10.1155/2021/9970240)
Supplement: Supplementary Materials — Table S1: berberine potential targets. Table S2: UC genes. Table S3: biological processes of clusters. Table S4: signaling pathways. [file 9970240.f1.zip › Table S2.xlsx]

## Sheet: Sheet1
Table S2 UC Genes
NOD2
IL23R
ABCB1
IL10
IL6
IRF5
ATG16L1
IRGM
INAVA
IL10RA
IL10RB
MLH1
SMAD7
CTNNB1
MSH2
AKT1
MSH6
PIK3CA
TNF
HLA-DRB1
TLR2
IL2
TLR4
CXCL8
IL1B
BTNL2
MUC2
MPO
TP53
REG4
MST1
TNFSF15
IFNG
CRP
IL17A
IL4
MYO9B
IL1RN
REL
ZFP90
LACC1
ICAM1
APC
CCR6
IL22
SMAD3
CTSG
IL1R1
S100A12
PRTN3
CCR3
DUOX2
CLDN18
TPMT
MUC12
BPI
TLR5
IL13
BRINP3
SMAD4
PPARG
MIR21
UCN
IL23A
HLA-B
CCND1
TCF4
CLDN2
PLA2G2A
GPR35
H19
STAT3
LTF
POLE
POLD1
GALNT12
BRAF
SLC22A4
IFNG-AS1
SLC22A5
NKX2-3
RIPK1
MIR145
PRKCQ
CTLA4
ICOSLG
FOXD2-AS1
PTPN2
ODC1
BAX
MLH3
NOS2
ALB
IBD3
CARD9
AXIN2
PDGFRL
MT-CO1
IBD21
S100A9
CDH1
TNFRSF1A
IBD2
NOD1
JAK2
CD40LG
PLCG2
VEGFA
VDR
MIR126
MIR143
MIR141
MIR34A
IBD8
NFKB1
IBD5
ELANE
CD4
IL2RA
DEFB4A
CCL2
DLG5
TLR9
IBD7
MMP9
PTPN22
IL12B
IL18
IBD6
NLRP3
SRC
IBD4
IBD9
CXCL5
MMP1
TIMP1
KRAS
ALOX5
MAP3K7
MADCAM1
BUB1
BUB1B
MUTYH
GREM1
MIR140
MIR192
MIRLET7A1
MIR26A1
MIR127
PSC
IBD11
IBD12
IBD15
IBD16
IBD18
IBD20
IBD22
IBD23
IBD24
IBD26
IBD27
NFKBIA
MUC5AC
IL26
TGFB1
HSPA1L
MICA
PTGS2
ITGA4
SLC11A1
FOXP3
MMP3
STAT1
MTHFR
RELA
SOCS1
TAC1
FCGR2A
MUC3A
FUT2
NFE2L2
CCL11
PTGER4
SIAE
NOX1
FCGR3A
CSF2
AURKA
PMS2
HLA-A
SOCS3
IL21
HLA-DRA
IL6R
TNFRSF1B
KRT7
IL15
HLA-DQB1
RIPK2
FOS
MUC1
MMP2
HMGB1
SELE
CXCR2
VIP
NFATC1
IL18RAP
HRAS
MIR155
