# Supplementary material for: Exploring the Mechanism of Berberine Intervention in Ulcerative Colitis from the Perspective of Inflammation and Immunity Based on Systemic Pharmacology
Source: Evid Based Complement Alternat Med. 2021 Jun 9;2021:9970240. doi: 10.1155/2021/9970240 (PMC8208865; doi:10.1155/2021/9970240)
Supplement: Supplementary Materials — Table S1: berberine potential targets. Table S2: UC genes. Table S3: biological processes of clusters. Table S4: signaling pathways. [file 9970240.f1.zip › Table S3.xlsx]

## Sheet: Sheet1
Table S3 Biological processes of clusters
Cluster	Term	Pathway	Count	%	Pvalue	Genes	Fold Enrichment	Bonferroni
1	GO:0006954	inflammatory response	31	44.9275	1.02349e-31	CRP, IL22, CXCL8, HMGB1, PTGS2, TNF, RELA, CCL5, CXCR2, CCL2, AKT1, NLRP3, IL10, TGFB1, IL15, IL13, IL18, FOS, TNFRSF1B, SELE, NFKB1, TNFRSF1A, IL6, CD40LG, IL1B, REL, TLR9, TLR5, TLR4, IL17A, TLR2	19.9056	1.55776e-28
	GO:0071222	cellular response to lipopolysaccharide	17	24.6377	6.35174e-21	IL10, CXCL8, CSF2, NOS2, SRC, MAPK14, TNFRSF1B, TNF, RELA, NFKB1, ICAM1, IL6, IFNG, CCL2, NLRP3, TLR5, TLR4	36.612	9.66736e-18
	GO:0006955	immune response	23	33.3333	4.64384e-19	IL10, IL22, CXCL8, CSF2, IL1R1, IL15, IL13, IL18, TNFRSF1B, TNF, IL2, TNFRSF1A, IL4, IL6, CD40LG, IFNG, IL1B, CCL5, CCL2, CTLA4, TLR4, IL17A, TLR2	13.2953	7.06793e-16
	GO:0048661	positive regulation of smooth muscle cell proliferation	13	18.8406	8.30257e-18	STAT1, IL13, IL18, IGF1, PTGS2, TNF, EGFR, IL6, CCL5, AKT1, HMOX1, IL6R, ELANE	52.7285	1.26365e-14
	GO:0031663	lipopolysaccharide-mediated signaling pathway	11	15.942	3.54788e-17	NFKBIA, TGFB1, CCL5, IL1B, IL18, CCL2, AKT1, MAPK14, TNF, TLR4, TLR2	83.6558	5.39988e-14
	GO:0043066	negative regulation of apoptotic process	22	31.8841	4.27098e-17	IL10, SRC, ANXA5, STAT3, IGF1, MPO, MMP9, EGFR, IL2, RELA, NFKB1, VEGFA, IL4, NFKBIA, SOCS3, IL6, CD40LG, CASP3, ALB, AKT1, TIMP1, TP53	11.767	6.50043e-14
	GO:0071407	cellular response to organic cyclic compound	12	17.3913	4.87463e-16	NFKBIA, TGFB1, STAT1, CCL5, IL1B, CASP3, STAT3, IL18, CCL2, AKT1, NOD2, TNF	49.4974	6.75904e-13
	GO:0045429	positive regulation of nitric oxide biosynthetic process	11	15.942	1.01498e-15	IL6, IFNG, IL1B, AKT1, JAK2, TLR5, PTGS2, TNF, TLR4, EGFR, ICAM1	62.2555	1.52078e-12
	GO:0051092	positive regulation of NF-kappaB transcription factor activity	14	20.2899	5.70163e-15	TGFB1, NOD2, TNF, RELA, NFKB1, ICAM1, NFKBIA, IL6, CD40LG, IL1B, TLR9, NLRP3, TLR4, TLR2	25.6171	8.61777e-12
	GO:0071260	cellular response to mechanical stimulus	11	15.942	2.26119e-13	TGFB1, IL1B, IL13, CASP1, AKT1, TLR5, PTGS2, TLR4, EGFR, NFKB1, TNFRSF1A	37.704	3.44204e-10
	GO:0050729	positive regulation of inflammatory response	11	15.942	3.02373e-13	IL15, CCL5, IL18, TLR9, CCL2, JAK2, TLR4, EGFR, IL2, TLR2, TNFRSF1A	36.671	4.6029e-10
	GO:0032496	response to lipopolysaccharide	12	17.3913	5.21853e-11	CASP3, IL13, CASP1, FOS, JAK2, PTGS2, MPO, SELE, TLR4, ELANE, TLR2, TNFRSF1A	17.807	7.9426e-08
	GO:0070374	positive regulation of ERK1 and ERK2 cascade	12	17.3913	1.0526e-10	IL6, TGFB1, SRC, CCL5, CCL2, HMGB1, NOD2, TNF, TLR4, EGFR, ICAM1, VEGFA	16.6877	1.60205e-07
	GO:0042517	positive regulation of tyrosine phosphorylation of Stat3 protein	8	11.5942	1.48582e-10	SOCS3, IL6, IL15, STAT3, IL18, JAK2, IL6R, VEGFA	51.2342	2.26142e-07
	GO:0045893	positive regulation of transcription, DNA-templated	17	24.6377	1.64029e-10	IL10, TGFB1, STAT1, SRC, STAT3, FOS, IGF1, TNF, FOXP3, RELA, NFKB1, IL4, IL6, CDH1, IL1B, PPARG, TP53	8.03332	2.49652e-07
	GO:0042346	positive regulation of NF-kappaB import into nucleus	7	10.1449	1.82051e-10	IL1B, IL18, TLR9, PTGS2, TNF, TLR4, TLR2	81.1208	2.77081e-07
	GO:0032733	positive regulation of interleukin-10 production	7	10.1449	3.36527e-10	IL4, CD40LG, TLR9, HMGB1, NOD2, TLR4, TLR2	74.0668	5.12194e-07
	GO:0032755	positive regulation of interleukin-6 production	8	11.5942	5.22488e-10	IL6, IL1B, TLR9, NOD2, IL6R, TNF, TLR4, TLR2	43.2644	7.95226e-07
	GO:0032760	positive regulation of tumor necrosis factor production	8	11.5942	7.19516e-10	IFNG, TLR9, CCL2, HMGB1, NOD2, JAK2, TLR4, TLR2	41.4234	1.0951e-06
	GO:0032757	positive regulation of interleukin-8 production	7	10.1449	7.60253e-10	IL1B, TLR9, NOD2, TLR5, TNF, TLR4, TLR2	65.5206	1.1571e-06
	GO:0051770	positive regulation of nitric-oxide synthase biosynthetic process	6	8.69565	1.1767e-09	TLR9, CCL2, NOD2, JAK2, TLR4, TLR2	112.321	1.79093e-06
	GO:0043491	protein kinase B signaling	7	10.1449	3.57709e-09	TGFB1, CCL5, IL1B, CCL2, AKT1, IGF1, TNF	51.6223	5.44432e-06
	GO:0032722	positive regulation of chemokine production	6	8.69565	5.58724e-09	IL6, TLR9, IL6R, TNF, TLR4, TLR2	85.8926	8.50374e-06
	GO:0042742	defense response to bacterium	10	14.4928	6.64597e-09	IL10, IFNG, NOS2, TLR9, NOD2, TLR5, MPO, TLR4, ELANE, TNFRSF1A	16.7836	1.01151e-05
	GO:0071347	cellular response to interleukin-1	8	11.5942	1.4095e-08	IL6, CXCL8, CCL5, CCL2, RELA, NFKB1, IL17A, ICAM1	27.4211	2.14523e-05
	GO:0008284	positive regulation of cell proliferation	14	20.2899	3.82644e-08	TGFB1, CSF2, IL15, STAT3, IGF1, EGFR, IL2, RELA, VEGFA, IL6, IFNG, CXCR2, TIMP1, IL6R	7.31131	5.82367e-05
	GO:0032735	positive regulation of interleukin-12 production	6	8.69565	4.67854e-08	CD40LG, IFNG, TLR9, HMGB1, TLR4, TLR2	58.407	7.12049e-05
	GO:0045080	positive regulation of chemokine biosynthetic process	5	7.24638	5.07047e-08	IL4, IFNG, IL1B, HMOX1, TNF	121.681	7.71696e-05
	GO:0006928	movement of cell or subcellular component	8	11.5942	5.42915e-08	CXCL8, IFNG, STAT3, IL13, IGF1, JAK2, MAPK14, PTGS2	22.6384	8.26283e-05
	GO:0042102	positive regulation of T cell proliferation	7	10.1449	1.48431e-07	IL4, IL6, CD40LG, IFNG, IL15, CCL5, IL1B	28.3923	0.000225886
	GO:0032740	positive regulation of interleukin-17 production	5	7.24638	1.71064e-07	TGFB1, IL15, IL18, NOD2, IL2	93.6009	0.000260325
	GO:0060334	regulation of interferon-gamma-mediated signaling pathway	5	7.24638	1.71064e-07	SOCS3, SOCS1, IFNG, STAT1, JAK2	93.6009	0.000260325
	GO:0007259	JAK-STAT cascade	6	8.69565	1.73486e-07	SOCS3, SOCS1, STAT1, STAT3, CCL2, JAK2	45.6304	0.000264011
	GO:0050727	regulation of inflammatory response	7	10.1449	1.99542e-07	IL1R1, CASP1, NOD2, JAK2, PTGS2, SELE, RELA	27.0403	0.000303656
	GO:0022617	extracellular matrix disassembly	7	10.1449	6.16134e-07	CDH1, MMP1, MMP2, MMP3, TIMP1, MMP9, ELANE	22.415	0.000937317
	GO:0097191	extrinsic apoptotic signaling pathway	6	8.69565	7.10281e-07	TGFB1, IFNG, JAK2, TNFRSF1B, IL6R, TNF	34.766	0.00108046
	GO:0050728	negative regulation of inflammatory response	7	10.1449	7.75975e-07	SOCS3, NLRP3, TNFRSF1B, NFKB1, IL2, ELANE, TNFRSF1A	21.5637	0.00118034
	GO:0050718	positive regulation of interleukin-1 beta secretion	5	7.24638	1.7027e-06	IFNG, CASP1, NLRP3, HMGB1, NOD2	55.3096	0.00258816
	GO:0034097	response to cytokine	6	8.69565	2.10324e-06	IL4, STAT1, REL, FOS, TIMP1, IL6R	28.0803	0.00319602
	GO:0071456	cellular response to hypoxia	7	10.1449	2.45235e-06	SRC, HMOX1, AKT1, PTGS2, TP53, ICAM1, VEGFA	17.7452	0.00372553
	GO:0006915	apoptotic process	13	18.8406	2.53415e-06	STAT1, MAPK14, NFKB1, NFKBIA, IFNG, IL1B, CASP3, CASP1, NLRP3, JAK2, TP53, IL17A, TLR2	5.57974	0.00384955
	GO:0043123	positive regulation of I-kappaB kinase/NF-kappaB signaling	8	11.5942	3.87866e-06	CASP1, TLR9, REL, HMOX1, NOD2, TNF, RELA, TNFRSF1A	12.0925	0.00588595
	GO:0043406	positive regulation of MAP kinase activity	6	8.69565	3.96379e-06	TGFB1, SRC, TNF, EGFR, ELANE, VEGFA	24.7487	0.00601474
	GO:0042104	positive regulation of activated T cell proliferation	5	7.24638	4.02328e-06	IL4, IL18, IGF1, HMGB1, IL2	45.0671	0.00610473
	GO:0008285	negative regulation of cell proliferation	11	15.942	4.07986e-06	IL10, IL6, TGFB1, CXCL8, IL1B, STAT3, JAK2, PTGS2, TP53, FOXP3, TLR2	6.76006	0.00619032
	GO:0032715	negative regulation of interleukin-6 production	5	7.24638	4.67953e-06	IL10, TLR9, TNF, TLR4, FOXP3	43.4576	0.00709696
	GO:0046330	positive regulation of JNK cascade	6	8.69565	6.41826e-06	IL1B, TLR9, HMGB1, NOD2, TNF, TLR4	22.4642	0.00972107
	GO:0030593	neutrophil chemotaxis	6	8.69565	6.92268e-06	CXCL8, IFNG, CCL5, IL1B, CXCR2, CCL2	22.1238	0.010481
	GO:0032700	negative regulation of interleukin-17 production	4	5.7971	1.02396e-05	TGFB1, IFNG, TLR4, FOXP3	88.4954	0.015464
	GO:0006919	activation of cysteine-type endopeptidase activity involved in apoptotic process	6	8.69565	2.13274e-05	CASP3, CASP1, NLRP3, PPARG, JAK2, TNF	17.5925	0.0319395
	GO:0042981	regulation of apoptotic process	8	11.5942	2.40886e-05	TGFB1, STAT1, CASP1, NOD2, JAK2, TNFRSF1B, TP53, TNFRSF1A	9.14037	0.0359993
	GO:0032729	positive regulation of interferon-gamma production	5	7.24638	3.53056e-05	IL1B, IL18, TNF, TLR4, IL2	26.4524	0.0523177
	GO:0043536	positive regulation of blood vessel endothelial cell migration	4	5.7971	5.87541e-05	TGFB1, AKT1, MAPK14, VEGFA	51.2342	0.0855443
	GO:0000187	activation of MAPK activity	6	8.69565	7.24551e-05	IL1B, IGF1, NOD2, MAPK14, TNF, TLR4	13.6465	0.104417
	GO:0071356	cellular response to tumor necrosis factor	6	8.69565	8.26397e-05	IL6, CXCL8, CCL5, CCL2, RELA, ICAM1	13.2743	0.118194
	GO:0046427	positive regulation of JAK-STAT cascade	4	5.7971	9.25669e-05	IL10, IL22, IL6, CCL5	44.2477	0.131418
	GO:0071677	positive regulation of mononuclear cell migration	3	4.34783	9.64444e-05	IL4, TGFB1, TNF	182.522	0.136529
	GO:0007249	I-kappaB kinase/NF-kappaB signaling	5	7.24638	0.000101102	REL, TNF, TLR4, NFKB1, TNFRSF1A	20.2802	0.142629
	GO:0042127	regulation of cell proliferation	7	10.1449	0.00010241	NFKBIA, NOS2, SRC, JAK2, TNFRSF1B, TNF, TNFRSF1A	9.2083	0.144334
	GO:0033209	tumor necrosis factor-mediated signaling pathway	6	8.69565	0.000115227	CD40LG, STAT1, JAK2, TNFRSF1B, TNF, TNFRSF1A	12.3744	0.160866
	GO:0006935	chemotaxis	6	8.69565	0.000134823	IL4, CXCL8, CCL5, CXCR2, CCL2, MAPK14	11.9686	0.185528
	GO:0007159	leukocyte cell-cell adhesion	4	5.7971	0.000137052	CD40LG, CCL5, SELE, ICAM1	38.938	0.188286
	GO:0034612	response to tumor necrosis factor	4	5.7971	0.000137052	CASP3, JAK2, PTGS2, SELE	38.938	0.188286
	GO:0034123	positive regulation of toll-like receptor signaling pathway	3	4.34783	0.00016032	TLR9, TLR5, TLR2	146.017	0.216533
	GO:0032611	interleukin-1 beta production	3	4.34783	0.00016032	IL1B, CASP1, NLRP3	146.017	0.216533
	GO:0070431	nucleotide-binding oligomerization domain containing 2 signaling pathway	3	4.34783	0.00016032	NFKBIA, NOD2, RELA	146.017	0.216533
	GO:0032747	positive regulation of interleukin-23 production	3	4.34783	0.00016032	CSF2, IFNG, IL17A	146.017	0.216533
	GO:0042092	type 2 immune response	3	4.34783	0.00016032	IL10, IL4, IL18	146.017	0.216533
	GO:0032728	positive regulation of interferon-beta production	4	5.7971	0.000173287	TLR9, HMGB1, TLR4, TLR2	36.0537	0.231847
	GO:0032689	negative regulation of interferon-gamma production	4	5.7971	0.00019352	IL10, HMGB1, TLR4, FOXP3	34.766	0.255145
	GO:0010742	macrophage derived foam cell differentiation	3	4.34783	0.00023985	TGFB1, STAT1, PPARG	121.681	0.305869
	GO:0045084	positive regulation of interleukin-12 biosynthetic process	3	4.34783	0.00023985	IFNG, TLR4, RELA	121.681	0.305869
	GO:0032869	cellular response to insulin stimulus	5	7.24638	0.000266451	STAT1, SRC, CCL2, AKT1, PPARG	15.8027	0.333418
	GO:0045907	positive regulation of vasoconstriction	4	5.7971	0.000289622	AKT1, PTGS2, EGFR, ICAM1	30.4203	0.356523
	GO:0002755	MyD88-dependent toll-like receptor signaling pathway	4	5.7971	0.000317663	TLR9, TLR5, TLR4, TLR2	29.4985	0.383416
	GO:1903140	regulation of establishment of endothelial barrier	3	4.34783	0.000334911	IL1B, TNF, TNFRSF1A	104.298	0.399396
	GO:0032717	negative regulation of interleukin-8 production	3	4.34783	0.000334911	IL10, TLR9, IL6R	104.298	0.399396
	GO:0045630	positive regulation of T-helper 2 cell differentiation	3	4.34783	0.000445379	IL6, IL18, NLRP3	91.2609	0.492378
	GO:0002674	negative regulation of acute inflammatory response	3	4.34783	0.000445379	IL4, NLRP3, PPARG	91.2609	0.492378
	GO:0045416	positive regulation of interleukin-8 biosynthetic process	3	4.34783	0.000445379	TNF, TLR4, ELANE	91.2609	0.492378
	GO:2001240	negative regulation of extrinsic apoptotic signaling pathway in absence of ligand	4	5.7971	0.000447184	CSF2, IL1B, AKT1, TNF	26.3094	0.493771
	GO:0042130	negative regulation of T cell proliferation	4	5.7971	0.000447184	IL10, TGFB1, CTLA4, FOXP3	26.3094	0.493771
	GO:0030890	positive regulation of B cell proliferation	4	5.7971	0.000522939	IL4, IL13, TLR4, IL2	24.9602	0.548925
	GO:0070102	interleukin-6-mediated signaling pathway	3	4.34783	0.000571132	IL6, STAT3, IL6R	81.1208	0.580844
	GO:0032930	positive regulation of superoxide anion generation	3	4.34783	0.000571132	CRP, TGFB1, EGFR	81.1208	0.580844
	GO:0002548	monocyte chemotaxis	4	5.7971	0.000651218	IL6, CCL5, CCL2, IL6R	23.1774	0.628972
	GO:0090026	positive regulation of monocyte chemotaxis	3	4.34783	0.00186922	CCL5, CCL2, HMGB1	45.6304	0.942018
	GO:0002407	dendritic cell chemotaxis	3	4.34783	0.00211292	CCL5, CXCR2, HMGB1	42.9463	0.960016
	GO:0030224	monocyte differentiation	3	4.34783	0.00211292	CSF2, PPARG, VEGFA	42.9463	0.960016
2	GO:0007165	signal transduction	13	41.9355	3.03319e-07	IL21, MAP2K1, HSP90AA1, CCL11, NR3C1, ESR1, CXCL5, IGF1R, MAPK10, AR, PGR, HRAS, MET	6.06529	0.000206842
	GO:0008284	positive regulation of cell proliferation	8	25.8065	1.41784e-05	IL21, AR, ADAM17, KDR, KRAS, HRAS, CXCL5, IGF1R	9.29918	0.00962311
	GO:0006955	immune response	7	22.5806	8.53825e-05	IL21, IL1RN, CCL11, SMAD3, IL2RA, CXCL5, IGF1R	9.00651	0.0565702
	GO:0007173	epidermal growth factor receptor signaling pathway	4	12.9032	0.000133809	ADAM17, KRAS, PTPN11, HRAS	38.6912	0.0872232
	GO:0032740	positive regulation of interleukin-17 production	3	9.67742	0.000237751	IL21, IL23A, IL23R	125.002	0.1497
	GO:0070374	positive regulation of ERK1 and ERK2 cascade	5	16.129	0.000252752	MAP2K1, CCL11, KDR, PTPN11, HRAS	15.4765	0.158356
	GO:0043410	positive regulation of MAPK cascade	4	12.9032	0.00039964	AR, KDR, CTNNB1, HRAS	26.7495	0.238609
	GO:0006954	inflammatory response	6	19.3548	0.000510561	CCL11, IL23A, IL23R, IL2RA, CCR3, CXCL5	8.57537	0.294107
	GO:0008285	negative regulation of cell proliferation	6	19.3548	0.000623175	AR, MAP2K1, SMAD4, NOS3, CTNNB1, HRAS	8.20723	0.34632
	GO:0042104	positive regulation of activated T cell proliferation	3	9.67742	0.00105338	IL23A, IL23R, IL2RA	60.1864	0.512654
	GO:0045766	positive regulation of angiogenesis	4	12.9032	0.00111016	CCL11, NOS3, KDR, CCR3	18.841	0.531186
	GO:0010628	positive regulation of gene expression	5	16.129	0.00115332	AR, MAP2K1, SMAD3, KRAS, HRAS	10.3374	0.5448
	GO:0050900	leukocyte migration	4	12.9032	0.00131637	LCK, KRAS, PTPN11, HRAS	17.7599	0.59276
	GO:0042517	positive regulation of tyrosine phosphorylation of Stat3 protein	3	9.67742	0.00208417	IL21, IL23A, IL23R	42.764	0.758983
	GO:0032729	positive regulation of interferon-gamma production	3	9.67742	0.00304136	IL23A, IL23R, HRAS	35.3268	0.87474
	GO:0032496	response to lipopolysaccharide	4	12.9032	0.00305979	ADAM17, IL10RA, IL23R, CXCL5	13.2116	0.87631
	GO:0001666	response to hypoxia	4	12.9032	0.00349905	ADAM17, MUC1, SMAD4, SMAD3	12.5971	0.90842
	GO:0008283	cell proliferation	5	16.129	0.00388705	AR, SMAD4, IL2RA, HRAS, MET	7.39996	0.929781
	GO:0042102	positive regulation of T cell proliferation	3	9.67742	0.00512118	IL21, IL23A, IL23R	27.0839	0.969851
	GO:0070098	chemokine-mediated signaling pathway	3	9.67742	0.00710299	CCL11, CCR3, CXCL5	22.8878	0.992261
	GO:0032909	regulation of transforming growth factor beta2 production	2	6.45161	0.00712777	SMAD4, SMAD3	270.839	0.992392
	GO:0042520	positive regulation of tyrosine phosphorylation of Stat4 protein	2	6.45161	0.00712777	IL23A, IL23R	270.839	0.992392
	GO:0042510	regulation of tyrosine phosphorylation of Stat1 protein	2	6.45161	0.00712777	IL23A, IL23R	270.839	0.992392
	GO:2000330	positive regulation of T-helper 17 cell lineage commitment	2	6.45161	0.00712777	IL23A, IL23R	270.839	0.992392
	GO:0050729	positive regulation of inflammatory response	3	9.67742	0.00749515	IL21, CCL11, IL23A	22.2607	0.994089
	GO:0051135	positive regulation of NK T cell activation	2	6.45161	0.00890202	IL23A, IL23R	216.671	0.997753
	GO:0043382	positive regulation of memory T cell differentiation	2	6.45161	0.0106732	IL23A, IL23R	180.559	0.999337
	GO:2000318	positive regulation of T-helper 17 type immune response	2	6.45161	0.0106732	IL23A, IL23R	180.559	0.999337
	GO:0002827	positive regulation of T-helper 1 type immune response	2	6.45161	0.0142064	IL23A, IL23R	135.419	0.999942
	GO:0032725	positive regulation of granulocyte macrophage colony-stimulating factor production	2	6.45161	0.0177274	IL23A, IL23R	108.335	0.999995
	GO:0002446	neutrophil mediated immunity	2	6.45161	0.0194834	ADAM17, CXCL5	98.4868	0.999999
	GO:0032693	negative regulation of interleukin-10 production	2	6.45161	0.0212363	IL23A, IL23R	90.2796	1
	GO:0001916	positive regulation of T cell mediated cytotoxicity	2	6.45161	0.0229861	IL23A, IL23R	83.335	1
	GO:0002690	positive regulation of leukocyte chemotaxis	2	6.45161	0.0316902	ADAM17, CXCL5	60.1864	1
	GO:0007411	axon guidance	3	9.67742	0.0325907	SMAD4, KRAS, HRAS	10.2203	1
	GO:0017015	regulation of transforming growth factor beta receptor signaling pathway	2	6.45161	0.0351509	SMAD4, SMAD3	54.1677	1
	GO:0033077	T cell differentiation in thymus	2	6.45161	0.0471691	ADAM17, CTNNB1	40.1243	1
4	GO:0043101	purine-containing compound salvage	3	42.8571	9.66397e-06	GMPR2, ADK, GMPR	514.041	0.000550698
	GO:0006198	cAMP catabolic process	3	42.8571	1.1149e-05	PDE4D, PDE3B, PDE4B	479.771	0.000635293
	GO:0015951	purine ribonucleotide interconversion	2	28.5714	0.00071452	GMPR2, GMPR	2398.86	0.0399234
	GO:1901898	negative regulation of relaxation of cardiac muscle	2	28.5714	0.00071452	PDE4D, PDE4B	2398.86	0.0399234
	GO:0006144	purine nucleobase metabolic process	2	28.5714	0.00214228	GMPR2, GMPR	799.619	0.115065
	GO:0006163	purine nucleotide metabolic process	2	28.5714	0.00356835	GMPR2, GMPR	479.771	0.184341
	GO:0071872	cellular response to epinephrine stimulus	2	28.5714	0.00428074	PDE4D, PDE4B	399.81	0.216924
	GO:0032743	positive regulation of interleukin-2 production	2	28.5714	0.00499271	PDE4D, PDE4B	342.694	0.248209
	GO:0032729	positive regulation of interferon-gamma production	2	28.5714	0.0163267	PDE4D, PDE4B	104.298	0.608708
	GO:0030593	neutrophil chemotaxis	2	28.5714	0.0233556	PDE4D, PDE4B	72.6926	0.739997
5	GO:0000082	G1/S transition of mitotic cell cycle	3	60	0.00021749	DHFR, TYMS, POLE	98.7765	0.0191725
	GO:0046653	tetrahydrofolate metabolic process	2	40	0.00238017	DHFR, TYMS	671.68	0.191106
	GO:0000083	regulation of transcription involved in G1/S transition of mitotic cell cycle	2	40	0.00546804	DHFR, TYMS	292.035	0.386142
6	GO:0043401	steroid hormone mediated signaling pathway	3	37.5	0.000235157	RXRB, NR1I2, NR1H4	110.474	0.0312512
	GO:0006367	transcription initiation from RNA polymerase II promoter	3	37.5	0.00165923	RXRB, NR1I2, NR1H4	41.4276	0.200831
	GO:0030522	intracellular receptor signaling pathway	2	25	0.0157365	NR1I2, NR1H4	110.474	0.882501
	GO:0008202	steroid metabolic process	2	25	0.0177912	NR1I2, SULT2A1	97.6279	0.911384
8	GO:0043401	steroid hormone mediated signaling pathway	3	75	3.38888e-05	RARG, THRA, RARB	220.947	0.00230182
	GO:0006367	transcription initiation from RNA polymerase II promoter	3	75	0.000242755	RARG, THRA, RARB	82.8553	0.0163738
9	GO:0071732	cellular response to nitric oxide	2	28.5714	0.00499271	CCNA2, CDK2	342.694	0.648691
	GO:1902176	negative regulation of oxidative stress-induced intrinsic apoptotic signaling pathway	2	28.5714	0.00499271	SOD2, NFE2L2	342.694	0.648691
	GO:0043066	negative regulation of apoptotic process	3	42.8571	0.0102225	GSK3B, XIAP, SOD2	15.8166	0.883223
	GO:0007265	Ras protein signal transduction	2	28.5714	0.0247563	CCNA2, CDK2	68.5388	0.994695
	GO:0007626	locomotory behavior	2	28.5714	0.0296458	HPGDS, SOD2	57.1156	0.998145
	GO:0071456	cellular response to hypoxia	2	28.5714	0.0338205	CCNA2, NFE2L2	49.9762	0.999246
	GO:0018105	peptidyl-serine phosphorylation	2	28.5714	0.0438475	GSK3B, CDK2	38.3817	0.999915
10	GO:0042102	positive regulation of T cell proliferation	3	30	0.000444757	CD4, IL12B, JAK3	83.96	0.116722
	GO:0016477	cell migration	3	30	0.00358185	IL12B, JAK3, FGFR1	29.2884	0.632537
	GO:0007167	enzyme linked receptor protein signaling pathway	2	20	0.00481454	CD4, JAK3	373.156	0.739851
	GO:0032693	negative regulation of interleukin-10 production	2	20	0.0064148	IL12B, JAK3	279.867	0.833955
	GO:0060397	JAK-STAT cascade involved in growth hormone signaling pathway	2	20	0.00801278	PTPN1, JAK3	223.893	0.894027
	GO:0048469	cell maturation	2	20	0.0191348	REN, FGFR1	93.2889	0.99544
	GO:0006468	protein phosphorylation	3	30	0.0233441	PIK3CA, JAK3, FGFR1	11.0474	0.998626
	GO:0036092	phosphatidylinositol-3-phosphate biosynthetic process	2	20	0.0259642	PIK3CA, FGFR1	68.5388	0.999351
	GO:0050829	defense response to Gram-negative bacterium	2	20	0.0291019	CD4, IL12B	61.0618	0.999736
	GO:0014068	positive regulation of phosphatidylinositol 3-kinase signaling	2	20	0.0343115	F2, FGFR1	51.6677	0.999941
	GO:0014066	regulation of phosphatidylinositol 3-kinase signaling	2	20	0.0410468	PIK3CA, FGFR1	43.0564	0.999992
	GO:0031295	T cell costimulation	2	20	0.0410468	CD4, PIK3CA	43.0564	0.999992
	GO:0046854	phosphatidylinositol phosphorylation	2	20	0.0492791	PIK3CA, FGFR1	35.7277	0.999999
11	GO:0007179	transforming growth factor beta receptor signaling pathway	3	100	2.96927e-05	MAP3K7, TGFBR1, SMAD7	182.522	0.00355684
	GO:0010717	regulation of epithelial to mesenchymal transition	2	66.6667	0.00142878	TGFBR1, SMAD7	932.889	0.157664
	GO:0060389	pathway-restricted SMAD protein phosphorylation	2	66.6667	0.0015478	TGFBR1, SMAD7	861.128	0.169627
	GO:0000186	activation of MAPKK activity	2	66.6667	0.00547146	MAP3K7, TGFBR1	243.362	0.48231
	GO:0071560	cellular response to transforming growth factor beta stimulus	2	66.6667	0.00582777	TGFBR1, SMAD7	228.463	0.504099
	GO:0030512	negative regulation of transforming growth factor beta receptor signaling pathway	2	66.6667	0.00760838	TGFBR1, SMAD7	174.917	0.600082
