# Supplementary material for: Exploring the Mechanism of Berberine Intervention in Ulcerative Colitis from the Perspective of Inflammation and Immunity Based on Systemic Pharmacology
Source: Evid Based Complement Alternat Med. 2021 Jun 9;2021:9970240. doi: 10.1155/2021/9970240 (PMC8208865; doi:10.1155/2021/9970240)
Supplement: Supplementary Materials — Table S1: berberine potential targets. Table S2: UC genes. Table S3: biological processes of clusters. Table S4: signaling pathways. [file 9970240.f1.zip › Table S4.xlsx]

## Sheet: Sheet1
Table S4 Signaling Pathways
Term	Pathway	Count	%	Pvalue	Genes	Fold Enrichment	Bonferroni
hsa05321	Inflammatory bowel disease (IBD)	33	9.2437	1.34578e-27	IL21, IL22, IL23R, RORA, NOD2, TNF, RELA, IL18RAP, IL12B, IL10, TGFB2, TGFB1, SMAD3, STAT1, IL13, STAT3, IL18, NFATC1, FOXP3, IL2, NFKB1, IL4, IL6, IFNG, IL23A, IL1B, HLA-DRA, TLR5, TLR4, HLA-DRB1, IL17A, HLA-DQB1, TLR2	12.0646	3.4452e-25
hsa05323	Rheumatoid arthritis	28	7.84314	8.91049e-17	CSF2, CXCL8, TNF, CXCL5, ICAM1, CCL5, CTSK, CCL2, CTLA4, TGFB2, TGFB1, IL15, MMP1, MMP3, IL18, FOS, VEGFA, IL6, IFNG, IL23A, IL1B, HLA-DRA, TEK, TLR4, HLA-DRB1, IL17A, HLA-DQB1, TLR2	7.44481	2.84217e-14
hsa04668	TNF signaling pathway	29	8.12325	2.61512e-15	CSF2, NOD2, PTGS2, TNF, RELA, ICAM1, SOCS3, CASP7, CASP3, CCL5, CCL2, AKT1, RIPK1, MAP3K7, MAP2K1, IL15, MMP3, FOS, MAPK14, TNFRSF1B, SELE, MMP9, NFKB1, TNFRSF1A, MAPK10, NFKBIA, IL6, PIK3CA, IL1B	6.3415	6.82121e-13
hsa04660	T cell receptor signaling pathway	27	7.56303	3.15928e-14	GSK3B, ITK, CSF2, TNF, RELA, AKT1, CTLA4, HRAS, MAP3K7, IL10, MAP2K1, PDPK1, NFATC1, FOS, MAPK14, IL2, NFKB1, IL4, NFKBIA, ZAP70, CD4, CD40LG, IFNG, PIK3CA, LCK, KRAS, PRKCQ	6.31745	8.10019e-12
hsa04060	Cytokine-cytokine receptor interaction	38	10.6443	6.42694e-12	IL21, IL22, CCL11, CSF2, CXCL8, IL26, IL23R, TNF, CXCL5, IL18RAP, CCL5, CXCR2, IL12B, CCL2, IL6R, CCR3, IL10, TGFB2, TGFB1, IL10RB, IL15, IL1R1, TNFSF15, IL10RA, IL13, IL18, TNFRSF1B, TGFBR1, IL2, TNFRSF1A, IL4, IL6, CD40LG, IFNG, IL23A, IL1B, IL2RA, IL17A	3.65894	1.6453e-09
hsa04620	Toll-like receptor signaling pathway	25	7.0028	8.30184e-12	CXCL8, TNF, RELA, CCL5, CTSK, IL12B, AKT1, RIPK1, RAC1, MAP3K7, MAP2K1, STAT1, FOS, MAPK14, NFKB1, MAPK10, NFKBIA, IL6, PIK3CA, IL1B, TLR9, IRF5, TLR5, TLR4, TLR2	5.51839	2.12526e-09
hsa04630	Jak-STAT signaling pathway	28	7.84314	5.13565e-11	IL21, IL22, CSF2, IL23R, SOCS3, SOCS1, CCND1, PIM1, IL12B, AKT1, JAK2, JAK3, IL6R, IL10, IL10RB, IL15, STAT1, IL10RA, IL13, STAT3, PTPN11, IL2, IL4, IL6, IFNG, PIK3CA, IL23A, IL2RA	4.51823	1.31473e-08
hsa04068	FoxO signaling pathway	26	7.28291	2.64586e-10	SETD7, EGFR, IGF1R, CCND1, AKT1, PCK1, HRAS, IL10, TGFB2, MAP2K1, SMAD4, TGFB1, SMAD3, PDPK1, INSR, STAT3, BRAF, IGF1, MAPK14, SOD2, TGFBR1, MAPK10, IL6, PIK3CA, CDK2, KRAS	4.5399	6.77341e-08
hsa04066	HIF-1 signaling pathway	22	6.16246	3.50436e-10	MAP2K1, NOS2, NOS3, INSR, STAT3, IGF1, EGFR, RELA, NFKB1, IGF1R, VEGFA, IL6, IFNG, PIK3CA, PLCG2, AKT1, HMOX1, TEK, TIMP1, IL6R, EIF4E, TLR4	5.36203	8.97116e-08
hsa04931	Insulin resistance	23	6.44258	5.66472e-10	PTPN1, GSK3B, NOS3, PDPK1, NR1H2, INSR, STAT3, NR1H3, PTPN11, TNF, RELA, NFKB1, TNFRSF1A, MAPK10, NFKBIA, SOCS3, PPP1CC, IL6, PIK3CA, AKT1, PRKCQ, PCK1, PPARA	4.9829	1.45017e-07
hsa04064	NF-kappa B signaling pathway	19	5.32213	1.69747e-08	CXCL8, IL1R1, XIAP, PTGS2, TNF, RELA, NFKB1, ICAM1, TNFRSF1A, NFKBIA, ZAP70, CD40LG, LCK, IL1B, PLCG2, RIPK1, PRKCQ, MAP3K7, TLR4	5.1099	4.34552e-06
hsa04920	Adipocytokine signaling pathway	17	4.7619	2.41255e-08	STAT3, PTPN11, TNFRSF1B, TNF, RELA, NFKB1, TNFRSF1A, MAPK10, RXRB, NFKBIA, SOCS3, RXRA, AKT1, PRKCQ, JAK2, PCK1, PPARA	5.68236	6.17611e-06
hsa04151	PI3K-Akt signaling pathway	39	10.9244	4.46947e-08	GSK3B, RELA, EGFR, IGF1R, RXRA, CCND1, KDR, AKT1, RAC1, JAK2, PCK1, HRAS, JAK3, IL6R, EIF4E, MAP2K1, HSP90AA1, ITGA4, NOS3, PDPK1, INSR, IGF1, IL2, PTK2, NFKB1, VEGFA, IL4, IL6, CDK6, PIK3CA, IL2RA, CDK2, KRAS, TEK, MET, TP53, TLR4, FGFR1, TLR2	2.64499	1.14418e-05
hsa05223	Non-small cell lung cancer	15	4.20168	5.47945e-08	MAP2K1, PDPK1, BRAF, EGFR, RXRB, RXRA, CDK6, PIK3CA, CCND1, PLCG2, AKT1, RARB, KRAS, HRAS, TP53	6.26731	1.40273e-05
hsa04062	Chemokine signaling pathway	27	7.56303	6.58874e-08	GSK3B, ITK, CCL11, CXCL8, SRC, RELA, CXCL5, CCL5, CXCR2, CCL2, AKT1, RAC1, JAK2, PRKACA, HRAS, JAK3, CCR3, MAP2K1, STAT1, STAT3, BRAF, PTK2, NFKB1, NFKBIA, HCK, PIK3CA, KRAS	3.39648	1.6867e-05
hsa04370	VEGF signaling pathway	15	4.20168	1.75243e-07	MAP2K1, NOS3, SRC, PTGS2, MAPK14, PTK2, VEGFA, PIK3CA, MAPKAPK2, KDR, PLCG2, AKT1, KRAS, RAC1, HRAS	5.7536	4.48611e-05
hsa03320	PPAR signaling pathway	14	3.92157	3.71715e-06	PDPK1, MMP1, APOA2, NR1H3, RXRB, FABP3, RXRA, FABP4, FABP6, FABP7, PPARG, ACADM, PCK1, PPARA	4.88913	0.00095114
hsa04664	Fc epsilon RI signaling pathway	14	3.92157	4.42263e-06	MAP2K1, CSF2, PDPK1, IL13, MAPK14, TNF, MAPK10, IL4, PIK3CA, PLCG2, AKT1, KRAS, RAC1, HRAS	4.81723	0.00113156
hsa04010	MAPK signaling pathway	28	7.84314	8.34295e-06	TNF, RELA, EGFR, CASP3, AKT1, RAC1, PRKACA, HRAS, MAP3K7, HSPA8, TGFB2, MAP2K1, TGFB1, HSPA1L, IL1R1, BRAF, NFATC1, FOS, MAPK14, TGFBR1, NFKB1, TNFRSF1A, MAPK10, IL1B, MAPKAPK2, KRAS, TP53, FGFR1	2.5895	0.00213352
hsa04662	B cell receptor signaling pathway	13	3.64146	2.83517e-05	GSK3B, MAP2K1, NFATC1, FOS, RELA, NFKB1, NFKBIA, PIK3CA, PLCG2, AKT1, KRAS, RAC1, HRAS	4.40831	0.00723187
hsa04014	Ras signaling pathway	25	7.0028	2.93437e-05	RELA, EGFR, IGF1R, KDR, PLCG2, ABL1, AKT1, RAC1, PRKACA, HRAS, MAP2K1, INSR, PLA2G2A, PTPN11, IGF1, NFKB1, VEGFA, MAPK10, ZAP70, PIK3CA, REL, KRAS, TEK, MET, FGFR1	2.58827	0.00748395
hsa04012	ErbB signaling pathway	14	3.92157	6.96302e-05	GSK3B, MAP2K1, SRC, BRAF, EGFR, PTK2, MAPK10, PIK3CA, ERBB4, PLCG2, ABL1, AKT1, KRAS, HRAS	3.76519	0.017668
hsa04910	Insulin signaling pathway	18	5.04202	7.0577e-05	PTPN1, GSK3B, MAP2K1, PDPK1, INSR, PDE3B, BRAF, MAPK10, SOCS3, PPP1CC, SOCS1, PIK3CA, AKT1, KRAS, PCK1, PRKACA, HRAS, EIF4E	3.05191	0.0179061
hsa05320	Autoimmune thyroid disease	10	2.80112	0.000298283	IL10, IL4, CD40LG, HLA-B, HLA-DRA, CTLA4, HLA-A, HLA-DRB1, IL2, HLA-DQB1	4.49961	0.0735284
hsa04670	Leukocyte transendothelial migration	15	4.20168	0.000347591	ITK, ITGA4, MMP2, PTPN11, CLDN2, MAPK14, MMP9, PTK2, ICAM1, PIK3CA, CTNNA1, PLCG2, CLDN18, CTNNB1, RAC1	3.05191	0.0851533
hsa04514	Cell adhesion molecules (CAMs)	15	4.20168	0.00279046	ITGA4, HLA-B, HLA-A, CLDN2, SELE, ICAM1, CD4, CD40LG, CDH1, CLDN18, HLA-DRA, CTLA4, MADCAM1, HLA-DRB1, HLA-DQB1	2.47162	0.510982
hsa04750	Inflammatory mediator regulation of TRP channels	12	3.36134	0.00285544	MAPK10, PTGER4, PPP1CC, PIK3CA, IL1R1, SRC, IL1B, PLCG2, PRKCQ, IGF1, MAPK14, PRKACA	2.86506	0.519072
